# Supplementary material for: “On-The-Fly” Non-Adiabatic Dynamics Simulations on Photoinduced Ring-Closing Reaction of a Nucleoside-Based Diarylethene Photoswitch
Source: MDPI journal article supplement (doi:10.3390/molecules26092724), 2021-05-06
Supplement: s1 [file s1]

# Supplementary Materials: “On-The-Fly” Non-adiabatic Dynamics Simulations on Photoinduced Ring-Closing Reaction of a Nucleoside-Based Diarylethene Photoswitch

Dong-Hui Xu <sup>1</sup>, Laicai Li <sup>1</sup>, Xiang-Yang Liu <sup>1,\*</sup> and Ganglong Cui <sup>2,\*</sup>

<sup>1</sup> College of Chemistry and Material Science, Sichuan Normal University, Chengdu 610068, China

<sup>2</sup> Key Laboratory of Theoretical and Computational Photochemistry, Ministry of Education, College of Chemistry, Beijing Normal University, Beijing 100875, China

\* Correspondence: xiangyangliu@sicnu.edu.cn; ganglong.cui@bnu.edu.cn

## Table of Contents

|                                                                 |   |
|-----------------------------------------------------------------|---|
| Additional Figures .....                                        | 2 |
| Active Space of Open Form of PS-IV .....                        | 2 |
| Active Space of Closed Form of PS-IV .....                      | 2 |
| SA-CASSCF Optimized S <sub>0</sub> Structures .....             | 2 |
| SA-CASSCF Calculated S <sub>1</sub> Minimum Energy Path.....    | 3 |
| MS-CASPT2 Calculated S <sub>1</sub> Mulliken Charges .....      | 3 |
| Energy Difference Distributions of the Hopping Structures ..... | 4 |
| Coordinates.....                                                | 4 |

## Additional Figures

### Active Space of Open Form of PS-IV

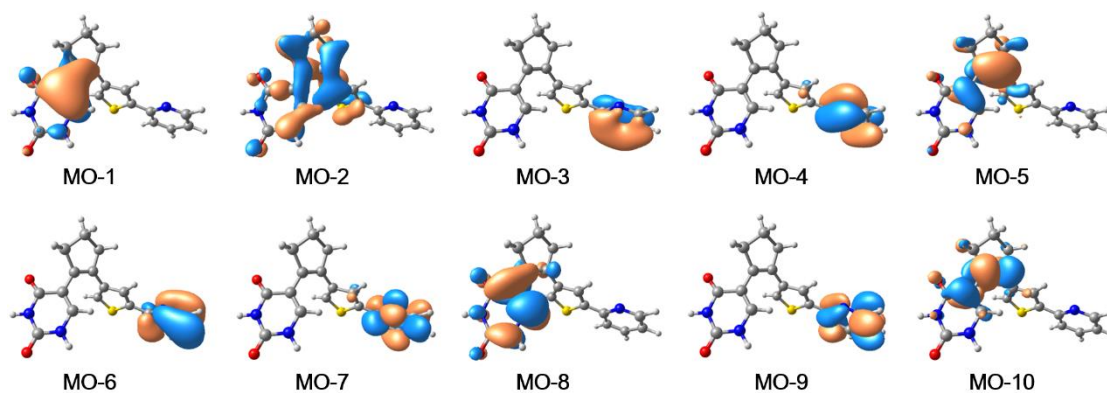

**Figure S1.** Molecular orbitals included in the (12,10) active space of the open form of PS-IV.

### Active Space of Closed Form of PS-IV

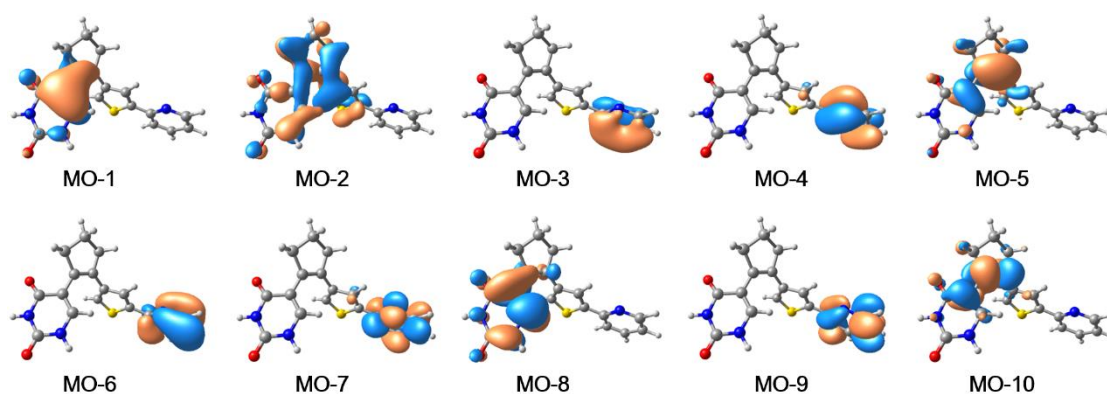

**Figure S2.** Molecular orbitals included in the (12,10) active space of the closed form of PS-IV.

### SA-CASSCF Optimized $S_0$ Structures

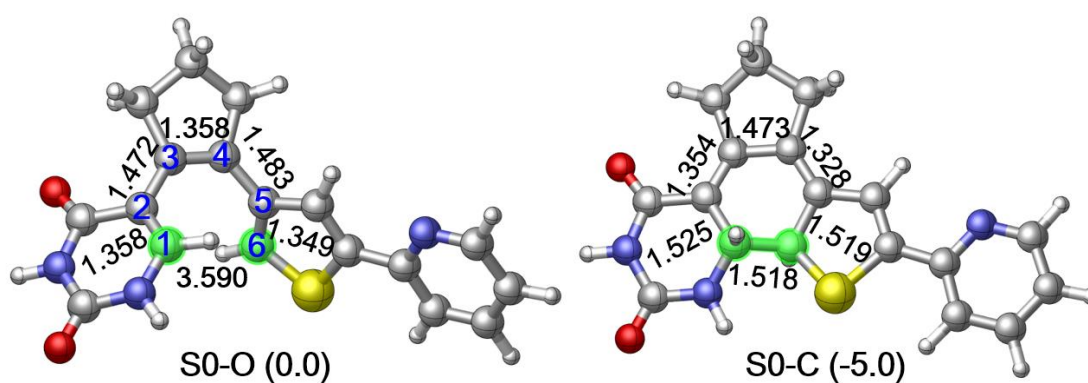

**Figure S3.** SA-CASSCF/6-31G\* optimized ground state structures and the relative energies calculated at MS-CASPT2//SA-CASSCF level of the simplified structure of PS-IV in open form (left, S0-O) and closed form (right, S0-C) respectively. Also shown are relevant bond lengths in angstrom.

SA-CASSCF Calculated  $S_1$  Minimum Energy Path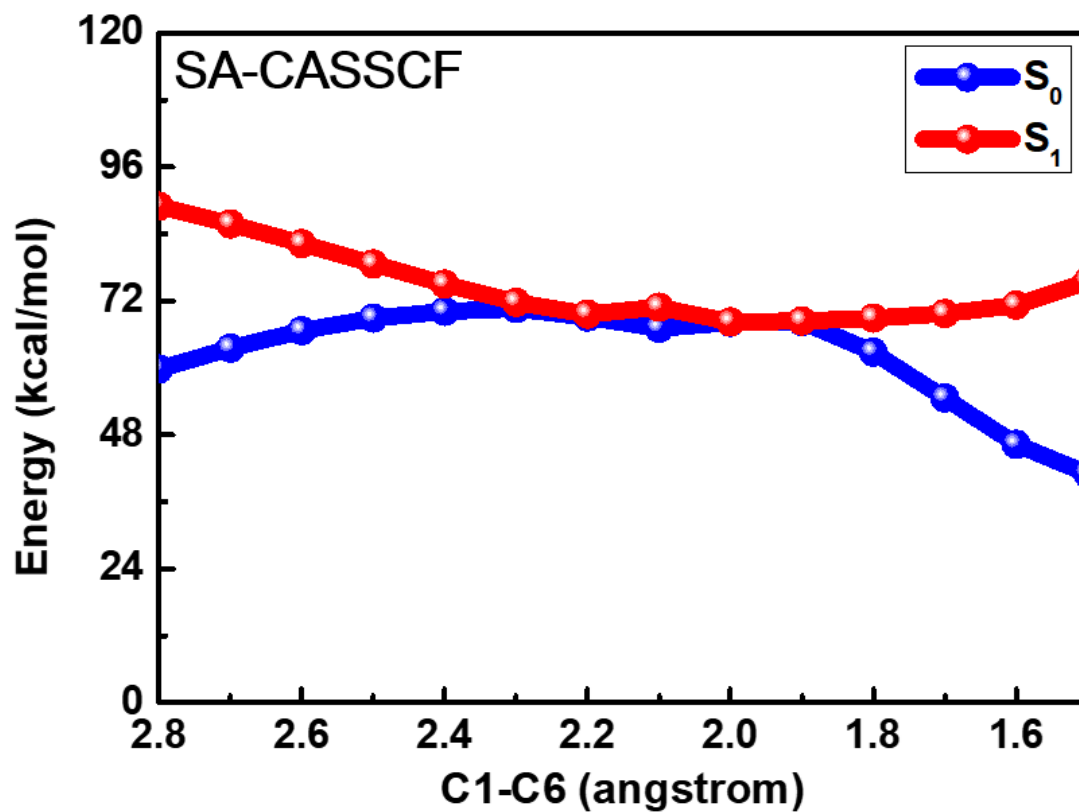

Figure S4. SA-CASSCF/6-31G\* calculated  $S_1$  relaxed scan of the C1-C6 bond connecting the PS-IV in open and closed form.

MS-CASPT2 Calculated  $S_1$  Mulliken Charges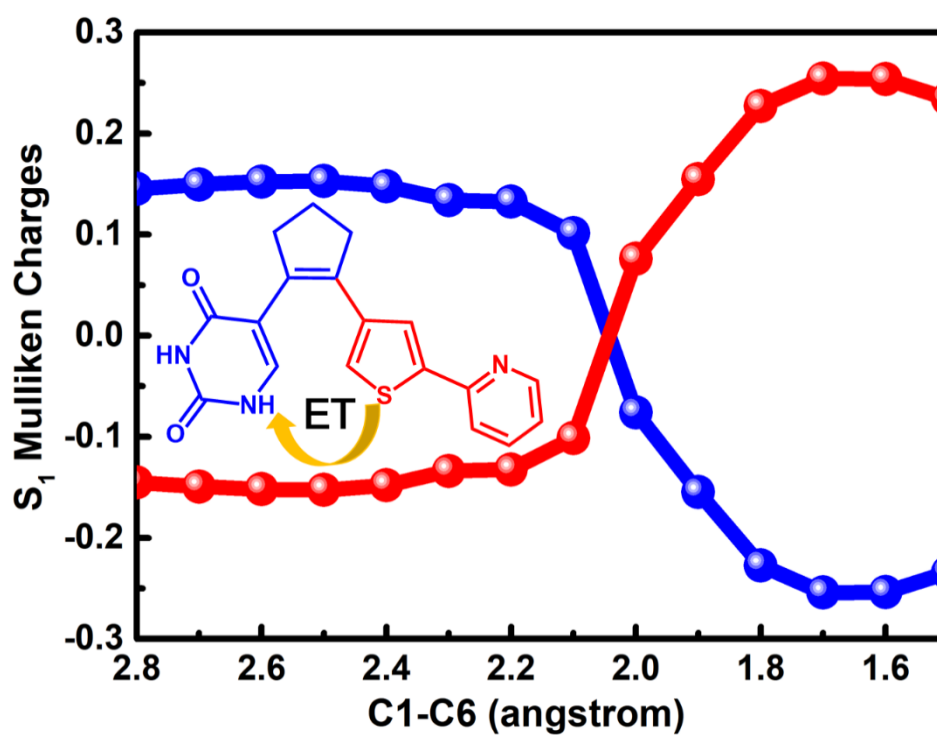

Figure S5. The  $S_1$  Mulliken charges of uracil-cyclopentene fragment (FRAG-1, in blue) and thiophene-pyridine fragment (FRAG-2, in red) calculated at MS-CASPT2//SA-CASSCF level along the ring closing reaction coordinate.

## Energy Difference Distributions of the Hopping Structures

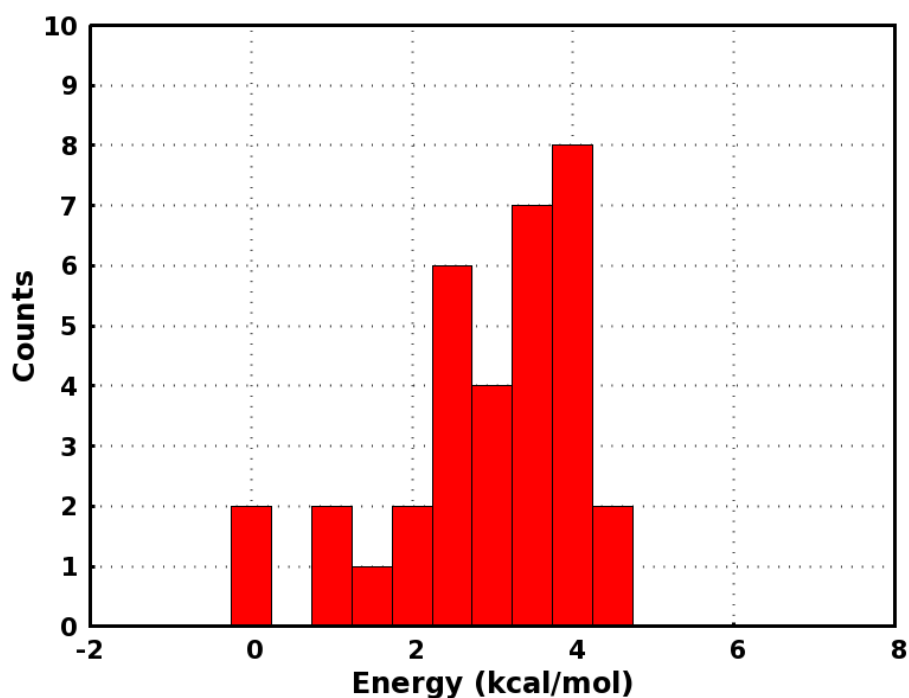Figure S6. The distributions of energy differences between  $S_1$  and  $S_0$  states of the hopping structures.

## Coordinates

Table S1. Cartesian Coordinates of All Optimized Structures (in xyz format).

| Unit: angstrom |             |             |             |
|----------------|-------------|-------------|-------------|
| 39             |             |             |             |
| S0_O_DFT       |             |             |             |
| C              | -5.60368602 | 0.53151149  | -1.25790297 |
| C              | -6.47130329 | -0.45540761 | -0.79501788 |
| C              | -5.97569387 | -1.38170825 | 0.11578777  |
| C              | -4.65177354 | -1.28435745 | 0.52139466  |
| C              | -3.85882417 | -0.25611107 | -0.00104705 |
| N              | -4.33284043 | 0.63871766  | -0.88102897 |
| H              | -6.61122897 | -2.17020871 | 0.50722901  |
| H              | -5.95041491 | 1.27654962  | -1.97100450 |
| H              | -7.49870266 | -0.49137031 | -1.13968475 |
| H              | -4.23888857 | -1.99337864 | 1.23278259  |
| C              | -0.17486832 | -0.25611342 | 1.34976748  |
| C              | -0.27811843 | 0.79104319  | 0.47031119  |
| C              | -1.59768909 | 0.88620723  | -0.07490533 |
| C              | -2.44833328 | -0.08350216 | 0.37866899  |
| S              | -1.64571937 | -1.13025777 | 1.50675643  |
| H              | -1.92065781 | 1.63536806  | -0.78810132 |
| C              | 1.84779978  | 3.79806611  | -0.47778046 |
| C              | 0.57057531  | 3.22701606  | 0.16379866  |
| C              | 0.81104817  | 1.73061501  | 0.14881546  |
| C              | 2.10332122  | 1.45174182  | -0.10416283 |
| C              | 2.92191550  | 2.72185101  | -0.23861680 |

---

|          |             |             |             |
|----------|-------------|-------------|-------------|
| H        | 2.12644558  | 4.77467421  | -0.07483700 |
| H        | -0.34086911 | 3.51231032  | -0.37327407 |
| H        | 0.44106604  | 3.56600946  | 1.20102365  |
| H        | 3.65848472  | 2.66103871  | -1.04644448 |
| H        | 3.48520346  | 2.89323526  | 0.68549347  |
| H        | 1.68650485  | 3.91574904  | -1.55439332 |
| C        | 3.89779766  | -2.47569368 | -0.61869620 |
| N        | 4.50823707  | -1.44749656 | 0.07226857  |
| C        | 4.02978928  | -0.15056245 | 0.31206925  |
| C        | 2.70639240  | 0.11972550  | -0.26662389 |
| C        | 2.10242863  | -0.87002174 | -0.96239025 |
| N        | 2.65968785  | -2.11311041 | -1.12556540 |
| O        | 4.69831150  | 0.63299326  | 0.95495062  |
| O        | 4.38127387  | -3.57496187 | -0.77270200 |
| H        | 5.41796581  | -1.66409244 | 0.46453397  |
| H        | 0.69523082  | -0.54642503 | 1.92329777  |
| H        | 1.12962612  | -0.72890661 | -1.42128761 |
| H        | 2.18480246  | -2.83325197 | -1.65196356 |
| 39       |             |             |             |
| S0_C_DFT |             |             |             |
| C        | -5.70976341 | 0.98257800  | -0.11941845 |
| C        | -6.43931960 | -0.20617250 | -0.17404185 |
| C        | -5.73984994 | -1.40472635 | -0.12980745 |
| C        | -4.35322353 | -1.37030219 | -0.03305815 |
| C        | -3.71376840 | -0.12819070 | 0.01392809  |
| N        | -4.38622579 | 1.03298510  | -0.02869896 |
| H        | -6.26213481 | -2.35560583 | -0.16900851 |
| H        | -6.22059837 | 1.94259145  | -0.15136578 |
| H        | -7.52084026 | -0.18278327 | -0.24907657 |
| H        | -3.77884950 | -2.29030104 | 0.00948359  |
| C        | 0.25533783  | -0.45452217 | 0.49742050  |
| C        | -0.13517480 | 0.98559815  | 0.22427886  |
| C        | -1.56239854 | 1.15167291  | 0.17223866  |
| C        | -2.24945099 | -0.01224975 | 0.11229759  |
| S        | -1.23081427 | -1.46279460 | 0.12078072  |
| H        | -2.06633924 | 2.11025004  | 0.13331013  |
| C        | 2.20526696  | 3.80174071  | -0.41946258 |
| C        | 0.77553401  | 3.40216905  | -0.00289507 |
| C        | 0.85180610  | 1.89825146  | 0.10003584  |
| C        | 2.24929685  | 1.47232729  | 0.11138721  |
| C        | 3.11930625  | 2.70467497  | 0.16284646  |
| H        | 2.48101919  | 4.80254690  | -0.07988776 |
| H        | 0.01290937  | 3.74445331  | -0.70889320 |
| H        | 0.52452568  | 3.82778088  | 0.97780503  |
| H        | 4.06150694  | 2.57702201  | -0.36837617 |
| H        | 3.36866447  | 2.91913228  | 1.21081078  |
| H        | 2.28219818  | 3.78795791  | -1.51174051 |
| C        | 3.20387732  | -2.64578157 | -0.08802956 |
| N        | 4.16343934  | -1.64265852 | -0.23135112 |
| C        | 3.99613021  | -0.27303954 | -0.05268313 |
| C        | 2.59055802  | 0.16775228  | -0.00335938 |

---

---

|          |             |             |             |
|----------|-------------|-------------|-------------|
| C        | 1.49614736  | -0.85280442 | -0.27865592 |
| N        | 1.92473832  | -2.18728743 | 0.10888107  |
| O        | 4.96588621  | 0.45524834  | 0.04178772  |
| O        | 3.50516894  | -3.81960684 | -0.10374708 |
| H        | 5.12111780  | -1.97318422 | -0.25687239 |
| H        | 0.47049655  | -0.57086656 | 1.56994425  |
| H        | 1.25066146  | -0.82121478 | -1.35730429 |
| H        | 1.24471650  | -2.93332516 | 0.01440786  |
| 39       |             |             |             |
| S0_TS    |             |             |             |
| C        | 5.53624672  | 0.99068258  | 0.58519445  |
| C        | 6.32158640  | -0.15052087 | 0.41751628  |
| C        | 5.70261052  | -1.31673989 | -0.01476322 |
| C        | 4.33514506  | -1.29751930 | -0.26097985 |
| C        | 3.63563070  | -0.10392788 | -0.06172433 |
| N        | 4.22826514  | 1.02415311  | 0.35598567  |
| H        | 6.27241271  | -2.22886084 | -0.16104822 |
| H        | 5.98357998  | 1.92280617  | 0.92233470  |
| H        | 7.38596589  | -0.11745163 | 0.62202426  |
| H        | 3.82171873  | -2.19077595 | -0.60355016 |
| C        | -0.25220729 | -0.40407138 | -0.74050612 |
| C        | 0.06114468  | 0.95687284  | -0.37710070 |
| C        | 1.43879566  | 1.14655411  | -0.13743016 |
| C        | 2.18728949  | 0.00132627  | -0.31120154 |
| S        | 1.23718650  | -1.35062174 | -0.80785265 |
| H        | 1.88373780  | 2.07388927  | 0.20193093  |
| C        | -2.31372875 | 3.86611459  | -0.14868933 |
| C        | -0.84262750 | 3.41093437  | -0.00767969 |
| C        | -0.97387134 | 1.90890992  | -0.11493259 |
| C        | -2.25545784 | 1.49261460  | 0.17136731  |
| C        | -3.15629592 | 2.68044826  | 0.36115934  |
| H        | -2.53344072 | 4.03551443  | -1.20729859 |
| H        | -0.42624710 | 3.71557711  | 0.96380646  |
| H        | -0.19832234 | 3.84230659  | -0.78138933 |
| H        | -3.39546915 | 2.76720275  | 1.43069651  |
| H        | -4.10762153 | 2.53146690  | -0.15711353 |
| H        | -2.52216346 | 4.79544875  | 0.38654631  |
| C        | -2.99756557 | -2.71613466 | 0.31103738  |
| N        | -3.94160931 | -1.82317636 | -0.10207158 |
| C        | -3.87139178 | -0.39582347 | -0.05826805 |
| C        | -2.61404298 | 0.11996922  | 0.35728562  |
| C        | -1.51672712 | -0.77504059 | 0.69045424  |
| N        | -1.81051769 | -2.11705454 | 0.75226375  |
| O        | -4.87190678 | 0.22638679  | -0.39709157 |
| O        | -3.13489984 | -3.92096735 | 0.34304292  |
| H        | -4.83988052 | -2.20866150 | -0.36552355 |
| H        | -0.95700861 | -0.61741207 | -1.53850402 |
| H        | -0.83800809 | -0.45874113 | 1.48664717  |
| H        | -1.14995039 | -2.77106421 | 1.15079338  |
| 39       |             |             |             |
| S0_O_CAS |             |             |             |

---

---

|          |              |             |             |
|----------|--------------|-------------|-------------|
| C        | -11.00261129 | -0.46156613 | -1.65514542 |
| C        | -9.86312310  | -0.67477202 | -2.41881503 |
| C        | -9.12227315  | 0.43729940  | -2.80582440 |
| C        | -9.54394755  | 1.68697926  | -2.42017210 |
| C        | -10.70774261 | 1.80878021  | -1.65207412 |
| N        | -11.41901498 | 0.74566836  | -1.28133805 |
| H        | -8.23064573  | 0.32455488  | -3.39600204 |
| H        | -11.60780547 | -1.28904041 | -1.33030201 |
| H        | -9.56925944  | -1.66960182 | -2.69684077 |
| H        | -8.98203967  | 2.55754693  | -2.70262947 |
| C        | -11.66557862 | 5.52105606  | -0.75944987 |
| C        | -12.53757823 | 4.72106710  | -0.11259094 |
| C        | -12.26475007 | 3.32966056  | -0.36838715 |
| C        | -11.22131820 | 3.12049268  | -1.19784457 |
| S        | -10.52042871 | 4.63375309  | -1.69311573 |
| H        | -12.83330785 | 2.52341360  | 0.05170086  |
| C        | -14.97738939 | 5.29764663  | 2.75613727  |
| C        | -13.57332335 | 4.90017186  | 2.27320920  |
| C        | -13.62126598 | 5.19158567  | 0.78422215  |
| C        | -14.68590879 | 5.97741825  | 0.47743160  |
| C        | -15.46909609 | 6.33527444  | 1.73294827  |
| H        | -14.98334846 | 5.67607597  | 3.77196602  |
| H        | -13.33645874 | 3.86236534  | 2.48694999  |
| H        | -12.79646711 | 5.50019725  | 2.74370988  |
| H        | -16.54263375 | 6.29235275  | 1.58322597  |
| H        | -15.23721756 | 7.34721253  | 2.04328513  |
| H        | -15.62531763 | 4.42667300  | 2.72923813  |
| C        | -15.92919067 | 7.27547902  | -3.47986437 |
| N        | -16.00202943 | 8.08006667  | -2.36718043 |
| C        | -15.63184471 | 7.78647823  | -1.06899737 |
| C        | -15.10455112 | 6.41366527  | -0.86495877 |
| C        | -15.04872501 | 5.61025150  | -1.95783702 |
| N        | -15.43638414 | 6.03309189  | -3.21660420 |
| O        | -15.73654159 | 8.61012903  | -0.21358663 |
| O        | -16.26775323 | 7.63905703  | -4.56585587 |
| H        | -16.35132753 | 9.00197182  | -2.52598232 |
| H        | -11.62787953 | 6.59127034  | -0.73839336 |
| H        | -14.68892261 | 4.60391208  | -1.90990462 |
| H        | -15.36800890 | 5.42092869  | -3.99797384 |
| 39       |              |             |             |
| S0_C_CAS |              |             |             |
| C        | -9.83687121  | -0.10127577 | -0.85144242 |
| C        | -9.33460658  | -0.45866351 | -2.09957885 |
| C        | -9.65384183  | 0.34704199  | -3.18543469 |
| C        | -10.44615254 | 1.45434775  | -2.98505920 |
| C        | -10.90909111 | 1.73841978  | -1.69619180 |
| N        | -10.60194741 | 0.96385222  | -0.64958924 |
| H        | -9.28864978  | 0.11315818  | -4.16907558 |
| H        | -9.61519823  | -0.69464520 | 0.01757691  |
| H        | -8.71947510  | -1.33195173 | -2.21002520 |
| H        | -10.70013639 | 2.09254911  | -3.80974184 |

---

---

|      |              |             |             |
|------|--------------|-------------|-------------|
| C    | -12.99316335 | 5.18403033  | -1.49518506 |
| C    | -13.07553362 | 4.42615929  | -0.18169034 |
| C    | -12.23496514 | 3.25231955  | -0.18459819 |
| C    | -11.76125349 | 2.90171723  | -1.40525289 |
| S    | -12.31734329 | 3.99034130  | -2.70945364 |
| H    | -12.02141748 | 2.67559932  | 0.69243128  |
| C    | -15.24546246 | 5.23124221  | 2.70980424  |
| C    | -14.01366007 | 4.44819423  | 2.21954374  |
| C    | -13.84669928 | 4.90670764  | 0.78628383  |
| C    | -14.67826920 | 6.10075630  | 0.55728783  |
| C    | -15.25295897 | 6.53425997  | 1.88897995  |
| H    | -15.22604481 | 5.41321409  | 3.77764916  |
| H    | -14.13541786 | 3.37511702  | 2.30810301  |
| H    | -13.13320550 | 4.72244592  | 2.79551920  |
| H    | -16.22806968 | 6.98412073  | 1.80390628  |
| H    | -14.59289571 | 7.27329734  | 2.33752135  |
| H    | -16.14659289 | 4.66551050  | 2.49244331  |
| C    | -15.07170277 | 7.62668949  | -3.35759648 |
| N    | -15.86004899 | 8.06954199  | -2.31098803 |
| C    | -15.76134887 | 7.73601566  | -0.97879312 |
| C    | -14.88204617 | 6.57645638  | -0.69342930 |
| C    | -14.33357241 | 5.78613052  | -1.87696716 |
| N    | -14.18635672 | 6.64726730  | -3.03632777 |
| O    | -16.36280687 | 8.36054940  | -0.15644006 |
| O    | -15.16351849 | 8.10916003  | -4.44727339 |
| H    | -16.44231126 | 8.85153742  | -2.52477087 |
| H    | -12.27293935 | 5.98963864  | -1.39217977 |
| H    | -15.02851061 | 4.97482709  | -2.09666848 |
| H    | -13.75892251 | 6.25288728  | -3.84694073 |
| 39   |              |             |             |
| S1S0 |              |             |             |
| C    | -10.38755849 | -0.36423504 | -1.10441343 |
| C    | -9.46747492  | -0.52350431 | -2.13284768 |
| C    | -9.23368791  | 0.55661246  | -2.97435168 |
| C    | -9.92163419  | 1.72967155  | -2.76320836 |
| C    | -10.82346280 | 1.80023141  | -1.69761010 |
| N    | -11.04829839 | 0.76500302  | -0.88799753 |
| H    | -8.52420866  | 0.48018040  | -3.77691763 |
| H    | -10.60580658 | -1.17257135 | -0.43063302 |
| H    | -8.95648386  | -1.45894277 | -2.26168667 |
| H    | -9.75644118  | 2.57611262  | -3.40168840 |
| C    | -12.70459780 | 5.29186639  | -1.45219852 |
| C    | -12.94128503 | 4.52737080  | -0.24726827 |
| C    | -12.27686842 | 3.26205730  | -0.27061931 |
| C    | -11.57087197 | 3.03485089  | -1.39173799 |
| S    | -11.64329221 | 4.36945991  | -2.53088155 |
| H    | -12.35707283 | 2.53361850  | 0.51664462  |
| C    | -15.11118104 | 5.24827049  | 2.74899791  |
| C    | -13.89451799 | 4.48297295  | 2.18808078  |
| C    | -13.83999872 | 4.97388839  | 0.75284739  |
| C    | -14.72130795 | 6.01472696  | 0.54247424  |

---

---

|           |              |             |             |
|-----------|--------------|-------------|-------------|
| C         | -15.31246641 | 6.48001454  | 1.84893130  |
| H         | -14.97593476 | 5.51230587  | 3.79050998  |
| H         | -14.00640534 | 3.40552076  | 2.26494531  |
| H         | -12.97392194 | 4.74001123  | 2.70796655  |
| H         | -16.33969524 | 6.79797490  | 1.75548922  |
| H         | -14.75361203 | 7.34111005  | 2.20174387  |
| H         | -15.99328724 | 4.62042603  | 2.68578730  |
| C         | -15.39032863 | 7.46627496  | -3.40547748 |
| N         | -15.65319028 | 8.22244858  | -2.29446420 |
| C         | -15.54953787 | 7.85024233  | -0.96051661 |
| C         | -15.03917409 | 6.50475086  | -0.74135622 |
| C         | -14.72659376 | 5.68461605  | -1.87520160 |
| N         | -14.93176790 | 6.20866637  | -3.14198608 |
| O         | -15.86176256 | 8.63071899  | -0.10514819 |
| O         | -15.56730109 | 7.86147414  | -4.52085532 |
| H         | -16.02827101 | 9.13112757  | -2.46668650 |
| H         | -12.47922659 | 6.33857680  | -1.37734730 |
| H         | -14.93784565 | 4.63670760  | -1.81108774 |
| H         | -14.82663667 | 5.62795879  | -3.94387709 |
| 39        |              |             |             |
| C1_C6_1.5 |              |             |             |
| C         | -10.07222403 | -0.00426932 | -0.89427794 |
| C         | -9.61883900  | -0.40999442 | -2.14930697 |
| C         | -9.83841476  | 0.43092456  | -3.23251519 |
| C         | -10.48764603 | 1.62617681  | -3.02761598 |
| C         | -10.91284069 | 1.95397174  | -1.73284907 |
| N         | -10.70343495 | 1.14150755  | -0.68712994 |
| H         | -9.50610195  | 0.15649079  | -4.21683667 |
| H         | -9.92204704  | -0.62586364 | -0.03054106 |
| H         | -9.11383513  | -1.35026362 | -2.26536559 |
| H         | -10.66672209 | 2.29385946  | -3.84870489 |
| C         | -12.95727723 | 5.38764912  | -1.44387715 |
| C         | -12.88134338 | 4.65858010  | -0.13867087 |
| C         | -12.13566264 | 3.52134056  | -0.15828792 |
| C         | -11.60116876 | 3.20161235  | -1.42829257 |
| S         | -11.91278015 | 4.42590370  | -2.59783753 |
| H         | -12.01610507 | 2.85996598  | 0.67439812  |
| C         | -15.21287516 | 5.09863892  | 2.82722431  |
| C         | -13.80727283 | 4.64067613  | 2.36029931  |
| C         | -13.76385202 | 5.11176285  | 0.92713502  |
| C         | -14.82035018 | 5.88580246  | 0.58521646  |
| C         | -15.72637181 | 6.10162050  | 1.76847332  |
| H         | -15.18847129 | 5.52767227  | 3.82184327  |
| H         | -13.68456520 | 3.56528908  | 2.46115100  |
| H         | -13.01407822 | 5.10119362  | 2.94427002  |
| H         | -16.76557115 | 5.94082459  | 1.50406916  |
| H         | -15.64557541 | 7.13524610  | 2.08441449  |
| H         | -15.87496431 | 4.24044929  | 2.86780424  |
| C         | -14.93180819 | 7.43575774  | -3.41788797 |
| N         | -15.18204799 | 8.20174399  | -2.31802714 |
| C         | -15.28723204 | 7.75671498  | -0.99101181 |

---

---

|           |              |             |             |
|-----------|--------------|-------------|-------------|
| C         | -15.02885762 | 6.38318013  | -0.78390231 |
| C         | -14.39120689 | 5.56255996  | -1.84792163 |
| N         | -14.50297440 | 6.16786430  | -3.15167810 |
| O         | -15.61057515 | 8.56719509  | -0.14561582 |
| O         | -15.05400126 | 7.84286680  | -4.54090325 |
| H         | -15.49780198 | 9.13018622  | -2.49449728 |
| H         | -12.50804274 | 6.36680481  | -1.38462354 |
| H         | -14.82953381 | 4.56936779  | -1.90311670 |
| H         | -14.45851744 | 5.58756067  | -3.95866381 |
| 39        |              |             |             |
| C1_C6_1.6 |              |             |             |
| C         | -10.11853894 | -0.03289744 | -0.91164263 |
| C         | -9.63814651  | -0.41848572 | -2.16255397 |
| C         | -9.81721379  | 0.44696654  | -3.23217283 |
| C         | -10.45604508 | 1.64762390  | -3.01886471 |
| C         | -10.90915666 | 1.95313769  | -1.72974312 |
| N         | -10.73907808 | 1.11785702  | -0.69724368 |
| H         | -9.46292265  | 0.18852170  | -4.21314936 |
| H         | -10.00001729 | -0.67418304 | -0.05751892 |
| H         | -9.14354740  | -1.36345311 | -2.28536691 |
| H         | -10.60463165 | 2.33438586  | -3.83026942 |
| C         | -12.90271182 | 5.40141158  | -1.42565273 |
| C         | -12.86413289 | 4.67318682  | -0.13426315 |
| C         | -12.14884789 | 3.51048951  | -0.15824140 |
| C         | -11.59008276 | 3.20815008  | -1.41521905 |
| S         | -11.85741185 | 4.45751904  | -2.56565064 |
| H         | -12.06408969 | 2.83210265  | 0.66492343  |
| C         | -15.20001253 | 5.10429498  | 2.83108296  |
| C         | -13.78844149 | 4.66745519  | 2.36369532  |
| C         | -13.75803790 | 5.12423114  | 0.92460496  |
| C         | -14.82715829 | 5.88000640  | 0.58045710  |
| C         | -15.73124155 | 6.09096850  | 1.76659905  |
| H         | -15.18037335 | 5.53969449  | 3.82308116  |
| H         | -13.64454940 | 3.59604677  | 2.47717094  |
| H         | -13.00185155 | 5.15018724  | 2.93858951  |
| H         | -16.76884223 | 5.91273581  | 1.50694646  |
| H         | -15.66412779 | 7.12819898  | 2.07408336  |
| H         | -15.84734633 | 4.23513913  | 2.87843412  |
| C         | -14.94367850 | 7.42302416  | -3.42381247 |
| N         | -15.18671583 | 8.19053986  | -2.32596349 |
| C         | -15.29200917 | 7.74858874  | -0.99454440 |
| C         | -15.05091677 | 6.37419569  | -0.78811627 |
| C         | -14.43704283 | 5.56100189  | -1.85034000 |
| N         | -14.54842042 | 6.14396718  | -3.15148398 |
| O         | -15.59736418 | 8.57037187  | -0.15243931 |
| O         | -15.04609002 | 7.82891630  | -4.54942682 |
| H         | -15.48401602 | 9.12525740  | -2.50109417 |
| H         | -12.51060111 | 6.40360109  | -1.37225184 |
| H         | -14.81895587 | 4.54595197  | -1.89046076 |
| H         | -14.48864191 | 5.56187215  | -3.95582235 |
| 39        |              |             |             |

---

## C1\_C6\_1.7

|   |              |             |             |
|---|--------------|-------------|-------------|
| C | -10.17018007 | -0.07302248 | -0.94232832 |
| C | -9.64965182  | -0.42916012 | -2.18565462 |
| C | -9.77804354  | 0.46789379  | -3.23453656 |
| C | -10.40933315 | 1.67174881  | -3.00958286 |
| C | -10.90341720 | 1.94581629  | -1.72991950 |
| N | -10.78250583 | 1.08038497  | -0.71734474 |
| H | -9.39164119  | 0.23271481  | -4.20922812 |
| H | -10.09137851 | -0.73985811 | -0.10336125 |
| H | -9.16316660  | -1.37711708 | -2.31780690 |
| H | -10.52014684 | 2.38279688  | -3.80601747 |
| C | -12.84014916 | 5.41033089  | -1.39852496 |
| C | -12.85620468 | 4.67275984  | -0.13048814 |
| C | -12.17502516 | 3.48215195  | -0.16334759 |
| C | -11.57954675 | 3.20531866  | -1.40172315 |
| S | -11.79017817 | 4.48845380  | -2.52413919 |
| H | -12.13710402 | 2.78074787  | 0.64382525  |
| C | -15.18745279 | 5.12573312  | 2.83722072  |
| C | -13.78002433 | 4.68290106  | 2.36596600  |
| C | -13.76106968 | 5.12135776  | 0.92034059  |
| C | -14.82791052 | 5.88374068  | 0.57910887  |
| C | -15.71219527 | 6.11875984  | 1.77631928  |
| H | -15.16492846 | 5.55612046  | 3.83142333  |
| H | -13.63423065 | 3.61343051  | 2.49416689  |
| H | -12.98971226 | 5.17444925  | 2.92849596  |
| H | -16.75681525 | 5.96232400  | 1.53227025  |
| H | -15.61850835 | 7.15512833  | 2.07968767  |
| H | -15.83977322 | 4.25991825  | 2.87987052  |
| C | -14.96013396 | 7.40359189  | -3.43010780 |
| N | -15.22719733 | 8.17063496  | -2.34088319 |
| C | -15.32982432 | 7.73675815  | -1.00369963 |
| C | -15.06461525 | 6.36978092  | -0.78715197 |
| C | -14.47333152 | 5.56246565  | -1.84525820 |
| N | -14.57907928 | 6.12072650  | -3.14265170 |
| O | -15.64722385 | 8.56515467  | -0.17266046 |
| O | -15.03477285 | 7.80086606  | -4.56075922 |
| H | -15.52622352 | 9.10386996  | -2.52117579 |
| H | -12.50841577 | 6.43234462  | -1.34301227 |
| H | -14.79492290 | 4.52809662  | -1.86852553 |
| H | -14.47697598 | 5.53844597  | -3.94244621 |

39

## C1\_C6\_1.8

|   |              |             |             |
|---|--------------|-------------|-------------|
| C | -10.20273898 | -0.11660604 | -0.96914572 |
| C | -9.63468495  | -0.44280199 | -2.20024712 |
| C | -9.71367881  | 0.48144578  | -3.22663591 |
| C | -10.34641977 | 1.68567818  | -2.99431885 |
| C | -10.88879258 | 1.92802985  | -1.72945459 |
| N | -10.81518160 | 1.03494035  | -0.73728537 |
| H | -9.28991826  | 0.26980898  | -4.19115349 |
| H | -10.16279693 | -0.80708293 | -0.14671596 |
| H | -9.15059389  | -1.39120235 | -2.33841396 |

---

|           |              |             |             |
|-----------|--------------|-------------|-------------|
| H         | -10.41991066 | 2.41859659  | -3.77505781 |
| C         | -12.78595343 | 5.40214899  | -1.37891387 |
| C         | -12.86833092 | 4.64974415  | -0.13960057 |
| C         | -12.20976355 | 3.43701148  | -0.17881453 |
| C         | -11.57187433 | 3.18639527  | -1.39329865 |
| S         | -11.73241550 | 4.49803409  | -2.49220546 |
| H         | -12.21657144 | 2.71605571  | 0.61183850  |
| C         | -15.17942802 | 5.15229774  | 2.83466178  |
| C         | -13.79106666 | 4.66774544  | 2.35280109  |
| C         | -13.78030844 | 5.09266298  | 0.90206102  |
| C         | -14.82185310 | 5.90240058  | 0.57720465  |
| C         | -15.65923059 | 6.19002472  | 1.79720289  |
| H         | -15.14455520 | 5.55448781  | 3.84039837  |
| H         | -13.67043758 | 3.59659215  | 2.49241782  |
| H         | -12.98271804 | 5.14623656  | 2.90156172  |
| H         | -16.71838769 | 6.11552946  | 1.58129994  |
| H         | -15.48007923 | 7.21310941  | 2.10845309  |
| H         | -15.86538833 | 4.31160507  | 2.85001778  |
| C         | -14.99410275 | 7.39608375  | -3.43204294 |
| N         | -15.29835772 | 8.15890466  | -2.35347050 |
| C         | -15.38724933 | 7.73674282  | -1.00887171 |
| C         | -15.07238367 | 6.38338989  | -0.77883380 |
| C         | -14.51740184 | 5.57446159  | -1.83977701 |
| N         | -14.61655487 | 6.11091314  | -3.12981404 |
| O         | -15.72727425 | 8.56842608  | -0.19107090 |
| O         | -15.04164479 | 7.78290597  | -4.56706799 |
| H         | -15.60210062 | 9.08946075  | -2.53964559 |
| H         | -12.50576870 | 6.43768607  | -1.31391212 |
| H         | -14.78975771 | 4.52785466  | -1.84345362 |
| H         | -14.47732530 | 5.52884258  | -3.92434656 |
| 39        |              |             |             |
| C1_C6_1.9 |              |             |             |
|           | -10.21199270 | -0.15999833 | -0.97224519 |
|           | -9.57842466  | -0.46195110 | -2.18178510 |
|           | -9.60336531  | 0.47407508  | -3.18631380 |
|           | -10.25453273 | 1.68317101  | -2.96338624 |
|           | -10.86044491 | 1.89861759  | -1.72757851 |
|           | -10.83546298 | 0.98223764  | -0.74846777 |
|           | -9.12930399  | 0.28272512  | -4.13147835 |
|           | -10.21227951 | -0.86887571 | -0.16432965 |
|           | -9.08712803  | -1.40827295 | -2.31029579 |
|           | -10.28663633 | 2.43024334  | -3.73321002 |
|           | -12.76133161 | 5.36868364  | -1.39538484 |
|           | -12.90330617 | 4.60311127  | -0.17706218 |
|           | -12.24265430 | 3.38463779  | -0.20918483 |
|           | -11.56461843 | 3.14978099  | -1.40049564 |
|           | -11.70183039 | 4.47075716  | -2.49733085 |
|           | -12.27522463 | 2.65601523  | 0.57378742  |
|           | -15.16628981 | 5.17772474  | 2.81731798  |
|           | -13.82621510 | 4.60283822  | 2.30433620  |
|           | -13.81585857 | 5.03669106  | 0.85486733  |

---

39  
C1\_C6\_2.0

|              |            |             |
|--------------|------------|-------------|
| -14.80601800 | 5.93523403 | 0.56762621  |
| -15.56243772 | 6.28847413 | 1.82292302  |
| -15.09601137 | 5.53627037 | 3.83771883  |
| -13.77657986 | 3.52523596 | 2.43678715  |
| -12.97784872 | 5.02223923 | 2.84181201  |
| -16.62951570 | 6.34865376 | 1.65063772  |
| -15.24823343 | 7.27392335 | 2.15063984  |
| -15.91919473 | 4.39613470 | 2.80273914  |
| -15.07298422 | 7.42444200 | -3.42361805 |
| -15.39424455 | 8.17930700 | -2.34612956 |
| -15.45050350 | 7.76519458 | -0.99684294 |
| -15.07677842 | 6.42488598 | -0.76363558 |
| -14.59187214 | 5.60465965 | -1.84642695 |
| -14.70539389 | 6.13133283 | -3.12280883 |
| -15.80187296 | 8.59144929 | -0.18123897 |
| -15.10952973 | 7.81063979 | -4.55783646 |
| -15.69828387 | 9.11032028 | -2.53018799 |
| -12.50232528 | 6.40853863 | -1.31246330 |
| -14.84483156 | 4.55564037 | -1.82666271 |
| -14.55167742 | 5.55378561 | -3.91844587 |

|              |             |             |
|--------------|-------------|-------------|
| -10.01721367 | -0.14089133 | -0.92341642 |
| -9.50492299  | -0.48130576 | -2.17118727 |
| -9.69522413  | 0.40809409  | -3.22056586 |
| -10.37265568 | 1.58381904  | -2.98529101 |
| -10.84850244 | 1.84614120  | -1.69721432 |
| -10.67160166 | 0.99085424  | -0.68872313 |
| -9.31987765  | 0.18567507  | -4.20308820 |
| -9.89419742  | -0.79863272 | -0.08183673 |
| -8.97896208  | -1.40764588 | -2.30947028 |
| -10.53613440 | 2.28385916  | -3.78282886 |
| -12.67609492 | 5.36587212  | -1.35267918 |
| -12.87896772 | 4.59150959  | -0.15214746 |
| -12.23412714 | 3.32008505  | -0.20756554 |
| -11.56509099 | 3.09454759  | -1.35932882 |
| -11.63069150 | 4.45506865  | -2.45391609 |
| -12.29821738 | 2.58313641  | 0.56734522  |
| -15.22211801 | 5.16988127  | 2.77409901  |
| -13.88612061 | 4.57230945  | 2.28499107  |
| -13.82291251 | 5.01453547  | 0.83815485  |
| -14.79004373 | 5.96669574  | 0.55422850  |
| -15.52854286 | 6.33994773  | 1.81733967  |
| -15.18447975 | 5.47742904  | 3.81258502  |
| -13.85827372 | 3.49309108  | 2.40752259  |
| -13.04301055 | 4.97239709  | 2.84472671  |
| -16.58790702 | 6.48623032  | 1.64850567  |
| -15.14087237 | 7.28328291  | 2.19073454  |
| -16.00340853 | 4.42148071  | 2.68622649  |
| -15.09855036 | 7.48562018  | -3.42102931 |
| -15.47784715 | 8.21333468  | -2.33307158 |

---

|           |              |             |             |
|-----------|--------------|-------------|-------------|
|           | -15.49784476 | 7.80153688  | -0.99573643 |
|           | -15.04338045 | 6.46038477  | -0.76554115 |
|           | -14.58615649 | 5.65800019  | -1.86878152 |
|           | -14.67479898 | 6.21058242  | -3.13445761 |
|           | -15.87429669 | 8.58538598  | -0.16071907 |
|           | -15.14349603 | 7.89853507  | -4.54284486 |
|           | -15.79106028 | 9.14344625  | -2.51298814 |
|           | -12.42515272 | 6.40676113  | -1.27186376 |
|           | -14.81706352 | 4.60614399  | -1.85882769 |
|           | -14.51321841 | 5.64141366  | -3.93498002 |
| 39        |              |             |             |
| C1_C6_2.1 |              |             |             |
| C         | -10.38755849 | -0.36423504 | -1.10441343 |
| C         | -9.46747492  | -0.52350431 | -2.13284768 |
| C         | -9.23368791  | 0.55661246  | -2.97435168 |
| C         | -9.92163419  | 1.72967155  | -2.76320836 |
| C         | -10.82346280 | 1.80023141  | -1.69761010 |
| N         | -11.04829839 | 0.76500302  | -0.88799753 |
| H         | -8.52420866  | 0.48018040  | -3.77691763 |
| H         | -10.60580658 | -1.17257135 | -0.43063302 |
| H         | -8.95648386  | -1.45894277 | -2.26168667 |
| H         | -9.75644118  | 2.57611262  | -3.40168840 |
| C         | -12.70459780 | 5.29186639  | -1.45219852 |
| C         | -12.94128503 | 4.52737080  | -0.24726827 |
| C         | -12.27686842 | 3.26205730  | -0.27061931 |
| C         | -11.57087197 | 3.03485089  | -1.39173799 |
| S         | -11.64329221 | 4.36945991  | -2.53088155 |
| H         | -12.35707283 | 2.53361850  | 0.51664462  |
| C         | -15.11118104 | 5.24827049  | 2.74899791  |
| C         | -13.89451799 | 4.48297295  | 2.18808078  |
| C         | -13.83999872 | 4.97388839  | 0.75284739  |
| C         | -14.72130795 | 6.01472696  | 0.54247424  |
| C         | -15.31246641 | 6.48001454  | 1.84893130  |
| H         | -14.97593476 | 5.51230587  | 3.79050998  |
| H         | -14.00640534 | 3.40552076  | 2.26494531  |
| H         | -12.97392194 | 4.74001123  | 2.70796655  |
| H         | -16.33969524 | 6.79797490  | 1.75548922  |
| H         | -14.75361203 | 7.34111005  | 2.20174387  |
| H         | -15.99328724 | 4.62042603  | 2.68578730  |
| C         | -15.39032863 | 7.46627496  | -3.40547748 |
| N         | -15.65319028 | 8.22244858  | -2.29446420 |
| C         | -15.54953787 | 7.85024233  | -0.96051661 |
| C         | -15.03917409 | 6.50475086  | -0.74135622 |
| C         | -14.72659376 | 5.68461605  | -1.87520160 |
| N         | -14.93176790 | 6.20866637  | -3.14198608 |
| O         | -15.86176256 | 8.63071899  | -0.10514819 |
| O         | -15.56730109 | 7.86147414  | -4.52085532 |
| H         | -16.02827101 | 9.13112757  | -2.46668650 |
| H         | -12.47922659 | 6.33857680  | -1.37734730 |
| H         | -14.93784565 | 4.63670760  | -1.81108774 |
| H         | -14.82663667 | 5.62795879  | -3.94387709 |

---

---

|           |              |             |             |
|-----------|--------------|-------------|-------------|
| 39        |              |             |             |
| C1_C6_2.2 |              |             |             |
| C         | -9.99746600  | -0.20257100 | -0.79440900 |
| C         | -9.36298000  | -0.54159300 | -1.98502100 |
| C         | -9.46056200  | 0.34085500  | -3.05186200 |
| C         | -10.17174500 | 1.50889500  | -2.88932000 |
| C         | -10.77476200 | 1.76921000  | -1.65606100 |
| N         | -10.68619800 | 0.92038200  | -0.63100400 |
| H         | -8.98896500  | 0.11963700  | -3.99205400 |
| H         | -9.94949200  | -0.85549500 | 0.05831700  |
| H         | -8.81604800  | -1.46210900 | -2.06701300 |
| H         | -10.26297000 | 2.20468800  | -3.70141900 |
| C         | -12.68350900 | 5.26363400  | -1.51770700 |
| C         | -12.97386100 | 4.50335300  | -0.31749000 |
| C         | -12.28049000 | 3.24361600  | -0.30000000 |
| C         | -11.54496500 | 3.00746100  | -1.40177000 |
| S         | -11.59763600 | 4.31831600  | -2.56145500 |
| H         | -12.35941500 | 2.53214800  | 0.49587600  |
| C         | -15.16922400 | 5.15048600  | 2.67854000  |
| C         | -13.97148400 | 4.38577900  | 2.08192000  |
| C         | -13.88687500 | 4.92328100  | 0.66585200  |
| C         | -14.73841000 | 6.01788600  | 0.49444800  |
| C         | -15.30648800 | 6.42777300  | 1.82960500  |
| H         | -15.04518400 | 5.36431900  | 3.73344500  |
| H         | -14.11994600 | 3.31100200  | 2.12522300  |
| H         | -13.05550600 | 4.59743400  | 2.63042000  |
| H         | -16.31828600 | 6.79809000  | 1.75596400  |
| H         | -14.70441200 | 7.24245100  | 2.22301300  |
| H         | -16.06927000 | 4.55294200  | 2.57331800  |
| C         | -15.36203100 | 7.67604200  | -3.36182200 |
| N         | -15.62384300 | 8.37759400  | -2.22209400 |
| C         | -15.51327300 | 7.93562100  | -0.90047500 |
| C         | -15.04541500 | 6.58264900  | -0.75386900 |
| C         | -14.78164000 | 5.78266300  | -1.92829300 |
| N         | -14.96564100 | 6.37416100  | -3.15486900 |
| O         | -15.78790400 | 8.70159900  | -0.01395700 |
| O         | -15.49109300 | 8.12721200  | -4.46047800 |
| H         | -15.91004800 | 9.32467600  | -2.34695500 |
| H         | -12.41303500 | 6.29917300  | -1.41454000 |
| H         | -15.03401200 | 4.73896400  | -1.90132500 |
| H         | -14.90891600 | 5.82635700  | -3.98432900 |
| 39        |              |             |             |
| C1_C6_2.3 |              |             |             |
| C         | -10.12894434 | -0.29724766 | -0.83197416 |
| C         | -9.33483031  | -0.56276492 | -1.94322641 |
| C         | -9.26856372  | 0.39677616  | -2.94329550 |
| C         | -9.98556804  | 1.56352781  | -2.79689021 |
| C         | -10.75864498 | 1.74529174  | -1.64754825 |
| N         | -10.82368196 | 0.82426566  | -0.68491502 |
| H         | -8.66716467  | 0.23654530  | -3.81969750 |
| H         | -10.20975180 | -1.01162273 | -0.03260535 |

---

---

|           |              |             |             |
|-----------|--------------|-------------|-------------|
| H         | -8.79196263  | -1.48652110 | -2.01598585 |
| H         | -9.94687673  | 2.32117958  | -3.55592664 |
| C         | -12.70835061 | 5.22410304  | -1.58915527 |
| C         | -13.01775976 | 4.47121804  | -0.37814833 |
| C         | -12.29765918 | 3.22065651  | -0.33183836 |
| C         | -11.54925171 | 2.97770408  | -1.42117954 |
| S         | -11.62007500 | 4.25783424  | -2.61740998 |
| H         | -12.37377628 | 2.52149004  | 0.47521225  |
| C         | -15.11518060 | 5.18230280  | 2.66570453  |
| C         | -14.00653081 | 4.33090472  | 2.01455072  |
| C         | -13.92492447 | 4.88087260  | 0.60067988  |
| C         | -14.73424619 | 6.03134137  | 0.46915777  |
| C         | -15.18785087 | 6.47583445  | 1.83425002  |
| H         | -14.92998476 | 5.37712110  | 3.71521321  |
| H         | -14.24632218 | 3.27241353  | 2.05050094  |
| H         | -13.06015812 | 4.45511335  | 2.53720264  |
| H         | -16.16164176 | 6.94119438  | 1.82183904  |
| H         | -14.48559639 | 7.22476915  | 2.19218183  |
| H         | -16.06477483 | 4.66092602  | 2.59702705  |
| C         | -15.47756165 | 7.69982814  | -3.34422386 |
| N         | -15.63624805 | 8.42099017  | -2.19881488 |
| C         | -15.51320029 | 7.97180855  | -0.87899332 |
| C         | -15.09198643 | 6.60213007  | -0.74927235 |
| C         | -14.91020367 | 5.78974385  | -1.93828791 |
| N         | -15.17270989 | 6.36866791  | -3.14569313 |
| O         | -15.72641824 | 8.75147471  | 0.01211696  |
| O         | -15.62215284 | 8.15119508  | -4.43966190 |
| H         | -15.89902966 | 9.37596254  | -2.31583458 |
| H         | -12.40577953 | 6.24953908  | -1.46649066 |
| H         | -15.15028609 | 4.74533218  | -1.88196636 |
| H         | -15.12736095 | 5.82667848  | -3.98026150 |
| 39        |              |             |             |
| C1_C6_2.4 |              |             |             |
| C         | -10.13596753 | -0.32833612 | -0.80157357 |
| C         | -9.29775922  | -0.58498360 | -1.88198638 |
| C         | -9.19004091  | 0.38392164  | -2.86949794 |
| C         | -9.91126906  | 1.55011924  | -2.74138267 |
| C         | -10.73069587 | 1.72255670  | -1.62298687 |
| N         | -10.83521933 | 0.79262076  | -0.67231644 |
| H         | -8.55348569  | 0.23120429  | -3.72213256 |
| H         | -10.24972435 | -1.04992120 | -0.01268060 |
| H         | -8.75333232  | -1.50881537 | -1.94123042 |
| H         | -9.84002615  | 2.31545100  | -3.49026366 |
| C         | -12.66759676 | 5.20993446  | -1.61797501 |
| C         | -13.02067469 | 4.45470019  | -0.41292629 |
| C         | -12.29679289 | 3.20256679  | -0.34789129 |
| C         | -11.52789701 | 2.95441140  | -1.41872738 |
| S         | -11.57560482 | 4.22938833  | -2.62846620 |
| H         | -12.38875720 | 2.50664648  | 0.46044729  |
| C         | -15.11239351 | 5.17890413  | 2.62328112  |
| C         | -14.04518319 | 4.29090691  | 1.95332365  |

---

---

|           |              |             |             |
|-----------|--------------|-------------|-------------|
| C         | -13.93979273 | 4.85930255  | 0.54711708  |
| C         | -14.72273677 | 6.04380859  | 0.43694934  |
| C         | -15.12437388 | 6.49057854  | 1.81825485  |
| H         | -14.91773435 | 5.34464785  | 3.67600868  |
| H         | -14.33226033 | 3.24387460  | 1.97133158  |
| H         | -13.09383914 | 4.36376111  | 2.47615584  |
| H         | -16.06800272 | 7.01284925  | 1.83474871  |
| H         | -14.36959657 | 7.18621602  | 2.17738943  |
| H         | -16.08597516 | 4.70500045  | 2.54598446  |
| C         | -15.57285602 | 7.75270366  | -3.33224743 |
| N         | -15.70388502 | 8.45924778  | -2.17253484 |
| C         | -15.53912668 | 7.99875054  | -0.86334757 |
| C         | -15.10177522 | 6.62594110  | -0.76001561 |
| C         | -14.96000880 | 5.82776293  | -1.96888102 |
| N         | -15.25703578 | 6.42127156  | -3.15980347 |
| O         | -15.72857269 | 8.76630869  | 0.04172891  |
| O         | -15.74947637 | 8.21975429  | -4.41581988 |
| H         | -15.97174149 | 9.41492785  | -2.27191195 |
| H         | -12.35227211 | 6.22946567  | -1.48085928 |
| H         | -15.18209866 | 4.77983239  | -1.91607217 |
| H         | -15.22743900 | 5.89126853  | -4.00283044 |
| 39        |              |             |             |
| C1_C6_2.5 |              |             |             |
| C         | -10.13273082 | -0.34856989 | -0.77780447 |
| C         | -9.26415409  | -0.60073307 | -1.83493171 |
| C         | -9.12722697  | 0.37343504  | -2.81376396 |
| C         | -9.85088219  | 1.53955975  | -2.70029435 |
| C         | -10.70216189 | 1.70731668  | -1.60512590 |
| N         | -10.83442185 | 0.77248212  | -0.66265079 |
| H         | -8.46641890  | 0.22467474  | -3.64849391 |
| H         | -10.26981186 | -1.07415624 | 0.00374333  |
| H         | -8.71915859  | -1.52487832 | -1.88337541 |
| H         | -9.75718422  | 2.30888453  | -3.44258310 |
| C         | -12.62402262 | 5.20140449  | -1.63993457 |
| C         | -13.01794860 | 4.44400508  | -0.44444921 |
| C         | -12.29499397 | 3.18809534  | -0.36660104 |
| C         | -11.50347708 | 2.93902119  | -1.41816191 |
| S         | -11.52123063 | 4.21627950  | -2.63124396 |
| H         | -12.40581747 | 2.49164491  | 0.43896956  |
| C         | -15.10437123 | 5.17258839  | 2.58738530  |
| C         | -14.07658941 | 4.25422087  | 1.89746949  |
| C         | -13.94927514 | 4.84205063  | 0.50009368  |
| C         | -14.71030688 | 6.05352514  | 0.41142198  |
| C         | -15.06372536 | 6.49818155  | 1.80688129  |
| H         | -14.90010740 | 5.31132950  | 3.64214716  |
| H         | -14.40702067 | 3.21990444  | 1.89715598  |
| H         | -13.12262658 | 4.27815015  | 2.41958488  |
| H         | -15.97787837 | 7.06794431  | 1.85153397  |
| H         | -14.26504360 | 7.14398279  | 2.16463651  |
| H         | -16.09749193 | 4.74194155  | 2.50512660  |
| C         | -15.67049666 | 7.79459557  | -3.31456235 |

---

---

|           |              |             |             |
|-----------|--------------|-------------|-------------|
| N         | -15.76975632 | 8.48965613  | -2.14336427 |
| C         | -15.56037855 | 8.02123055  | -0.84500497 |
| C         | -15.11285343 | 6.64519895  | -0.76606534 |
| C         | -15.01024198 | 5.85962221  | -1.99022971 |
| N         | -15.34458051 | 6.46347492  | -3.16525189 |
| O         | -15.72181240 | 8.78017503  | 0.07132996  |
| O         | -15.88054179 | 8.27380838  | -4.38643366 |
| H         | -16.04166049 | 9.44582989  | -2.22665973 |
| H         | -12.31506677 | 6.22163334  | -1.49846278 |
| H         | -15.20878075 | 4.80737217  | -1.94059749 |
| H         | -15.33075202 | 5.94368770  | -4.01510325 |
| 39        |              |             |             |
| C1_C6_2.6 |              |             |             |
| C         | -10.13917330 | -0.37032824 | -0.76286795 |
| C         | -9.24465111  | -0.61989479 | -1.79862191 |
| C         | -9.07585664  | 0.36137881  | -2.76551103 |
| C         | -9.79459801  | 1.53128495  | -2.66136601 |
| C         | -10.67340631 | 1.69617142  | -1.58761409 |
| N         | -10.83653031 | 0.75441157  | -0.65693768 |
| H         | -8.39446213  | 0.21493460  | -3.58396081 |
| H         | -10.30163260 | -1.10127815 | 0.00879023  |
| H         | -8.70455567  | -1.54724272 | -1.84036753 |
| H         | -9.67657309  | 2.30569664  | -3.39486123 |
| C         | -12.56879349 | 5.20087616  | -1.64895690 |
| C         | -13.00696659 | 4.44018943  | -0.46975058 |
| C         | -12.29320211 | 3.17637881  | -0.38481488 |
| C         | -11.47171387 | 2.93132966  | -1.41223645 |
| S         | -11.44082921 | 4.22297676  | -2.61316845 |
| H         | -12.43378184 | 2.47260960  | 0.40970722  |
| C         | -15.09672179 | 5.16885595  | 2.55466085  |
| C         | -14.10493397 | 4.22453877  | 1.84683273  |
| C         | -13.95287333 | 4.83170130  | 0.45940246  |
| C         | -14.69435853 | 6.06480330  | 0.38933584  |
| C         | -15.00976902 | 6.50452763  | 1.79541731  |
| H         | -14.88418570 | 5.28369434  | 3.61062228  |
| H         | -14.47577292 | 3.20412168  | 1.82800938  |
| H         | -13.15165557 | 4.20171488  | 2.36977545  |
| H         | -15.89739792 | 7.11205037  | 1.86250121  |
| H         | -14.17731927 | 7.10677413  | 2.15245198  |
| H         | -16.10556903 | 4.77699813  | 2.46966933  |
| C         | -15.76505774 | 7.82382861  | -3.29772885 |
| N         | -15.83134394 | 8.51217028  | -2.11913919 |
| C         | -15.57342238 | 8.04190222  | -0.83137202 |
| C         | -15.11705193 | 6.66437117  | -0.77227245 |
| C         | -15.05100656 | 5.88715991  | -2.00621444 |
| N         | -15.42453215 | 6.49516026  | -3.16686132 |
| O         | -15.70479535 | 8.79680444  | 0.09221725  |
| O         | -16.01199610 | 8.30942319  | -4.35863170 |
| H         | -16.10848148 | 9.46791443  | -2.18977064 |
| H         | -12.28777057 | 6.22873332  | -1.51177636 |
| H         | -15.22156533 | 4.83035158  | -1.95772097 |

---

---

|           |              |             |             |
|-----------|--------------|-------------|-------------|
| H         | -15.42867315 | 5.98144560  | -4.02053011 |
| 39        |              |             |             |
| C1_C6_2.7 |              |             |             |
| C         | -10.15395906 | -0.39456351 | -0.75612347 |
| C         | -9.23365796  | -0.64144400 | -1.76957676 |
| C         | -9.02890965  | 0.34918052  | -2.72004895 |
| C         | -9.73881523  | 1.52486484  | -2.62211823 |
| C         | -10.64547687 | 1.68647583  | -1.57120513 |
| N         | -10.84323547 | 0.73581442  | -0.65648911 |
| H         | -8.32699322  | 0.20521080  | -3.52137977 |
| H         | -10.34470852 | -1.13245984 | 0.00239845  |
| H         | -8.70173172  | -1.57373357 | -1.80733130 |
| H         | -9.59334915  | 2.30585136  | -3.34366715 |
| C         | -12.51089412 | 5.20145314  | -1.65145695 |
| C         | -12.99391891 | 4.43818428  | -0.49367705 |
| C         | -12.29495876 | 3.16396479  | -0.40596390 |
| C         | -11.43779578 | 2.92651168  | -1.40435124 |
| S         | -11.34674124 | 4.23973503  | -2.58014978 |
| H         | -12.47220942 | 2.44886438  | 0.37081130  |
| C         | -15.08664009 | 5.16789972  | 2.52418051  |
| C         | -14.13109734 | 4.19922349  | 1.79866631  |
| C         | -13.95429782 | 4.82468010  | 0.42166270  |
| C         | -14.67454787 | 6.07704915  | 0.36978643  |
| C         | -14.95487951 | 6.51116183  | 1.78461436  |
| H         | -14.86627026 | 5.25975693  | 3.58070757  |
| H         | -14.54158851 | 3.19441313  | 1.76248153  |
| H         | -13.18030461 | 4.13017196  | 2.32171954  |
| H         | -15.81546094 | 7.15346240  | 1.87240204  |
| H         | -14.09214024 | 7.07072150  | 2.13970073  |
| H         | -16.10938917 | 4.81418427  | 2.43792245  |
| C         | -15.85976357 | 7.84622389  | -3.27831960 |
| N         | -15.88308334 | 8.53319303  | -2.09661346 |
| C         | -15.57481557 | 8.06413570  | -0.82010970 |
| C         | -15.11583926 | 6.68488975  | -0.77813085 |
| C         | -15.08993435 | 5.91194804  | -2.01717343 |
| N         | -15.50662846 | 6.51993065  | -3.16292751 |
| O         | -15.67106837 | 8.81867078  | 0.10753950  |
| O         | -16.14904885 | 8.33321125  | -4.32775348 |
| H         | -16.16563768 | 9.48810835  | -2.15623250 |
| H         | -12.27721131 | 6.24185773  | -1.53166533 |
| H         | -15.23030218 | 4.85100988  | -1.96814061 |
| H         | -15.53570559 | 6.00874631  | -4.01764813 |
| 39        |              |             |             |
| C1_C6_2.7 |              |             |             |
| C         | -10.17557198 | -0.42224507 | -0.75926172 |
| C         | -9.22197416  | -0.66158565 | -1.74312743 |
| C         | -8.97443273  | 0.34249385  | -2.66915798 |
| C         | -9.67659416  | 1.52313816  | -2.57689437 |
| C         | -10.61839782 | 1.67680848  | -1.55595189 |
| N         | -10.85736216 | 0.71323167  | -0.66500598 |
| H         | -8.24564425  | 0.20480489  | -3.44733722 |

---

---

|   |              |             |             |
|---|--------------|-------------|-------------|
| H | -10.40019810 | -1.17051914 | -0.02045303 |
| H | -8.69740557  | -1.59809660 | -1.77736297 |
| H | -9.49893223  | 2.31384563  | -3.28047848 |
| C | -12.45376374 | 5.19993258  | -1.65045157 |
| C | -12.98095900 | 4.43574766  | -0.51834931 |
| C | -12.30002854 | 3.14990541  | -0.43075814 |
| C | -11.40433363 | 2.92154928  | -1.39606240 |
| S | -11.24834761 | 4.25948647  | -2.53682529 |
| H | -12.51724391 | 2.42194548  | 0.32366287  |
| C | -15.07389420 | 5.16926177  | 2.49508446  |
| C | -14.15607744 | 4.17739250  | 1.75108147  |
| C | -13.95513318 | 4.81894045  | 0.38441163  |
| C | -14.65162167 | 6.08884486  | 0.35001362  |
| C | -14.90200272 | 6.51697057  | 1.77157668  |
| H | -14.84300326 | 5.24072806  | 3.55093288  |
| H | -14.60555448 | 3.19000177  | 1.69926479  |
| H | -13.20882743 | 4.06263612  | 2.27225098  |
| H | -15.73797409 | 7.18840878  | 1.87672948  |
| H | -14.01517434 | 7.03911558  | 2.12415676  |
| H | -16.10876420 | 4.85192250  | 2.41260086  |
| C | -15.96169093 | 7.86228458  | -3.25476462 |
| N | -15.93074284 | 8.55275092  | -2.07466167 |
| C | -15.56338972 | 8.08828719  | -0.81233084 |
| C | -15.10797644 | 6.70685126  | -0.78611982 |
| C | -15.12963104 | 5.93422079  | -2.02535822 |
| N | -15.59688945 | 6.53832950  | -3.15337501 |
| O | -15.61499603 | 8.84624224  | 0.11608356  |
| O | -16.30082440 | 8.34669476  | -4.29043651 |
| H | -16.21583993 | 9.50753177  | -2.12421453 |
| H | -12.28196409 | 6.25446294  | -1.56342992 |
| H | -15.23979817 | 4.86997660  | -1.97361240 |
| H | -15.66002037 | 6.02624139  | -4.00570874 |

---
